# Supplementary material
Source: PubMed Central journal article supplement (PMC7044779)
Supplement: Supp_Fig1.pdf [file Supp_Fig1.pdf]

## Supplementary Data

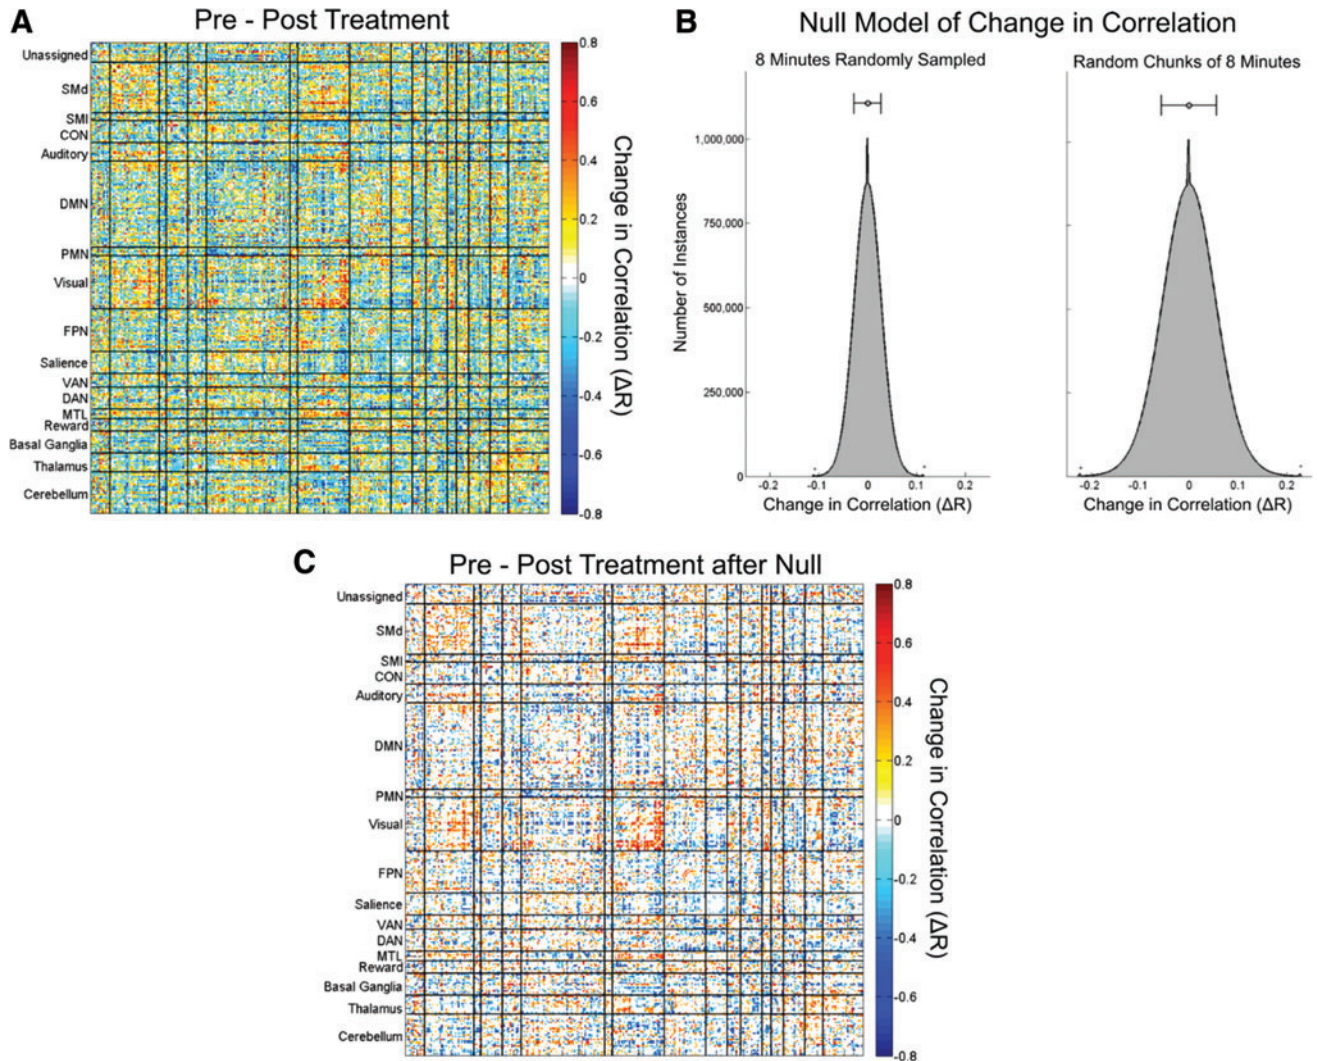

**SUPPLEMENTARY FIG. S1.** The null model. **(A)** The raw difference matrix showing the change in correlation between time points (pre-WBRT – post-WBRT). **(B)** The null model, that is, the distribution of changes in correlation that are expected due to sampling variability (see Creation of a Null Model section). The maximum change in correlation from sampling variability is  $\pm 0.25$ . **(C)** The difference matrix after all correlations within the range of  $-0.25$  to  $+0.25$  was set to 0 (also displayed in the bottom triangle of the matrix in Fig. 3C). WBRT, whole-brain radiation therapy.
