# Supplementary material
Source: PubMed Central journal article supplement (PMC7044779)
Supplement: Supp_Fig2.pdf [file Supp_Fig2.pdf]

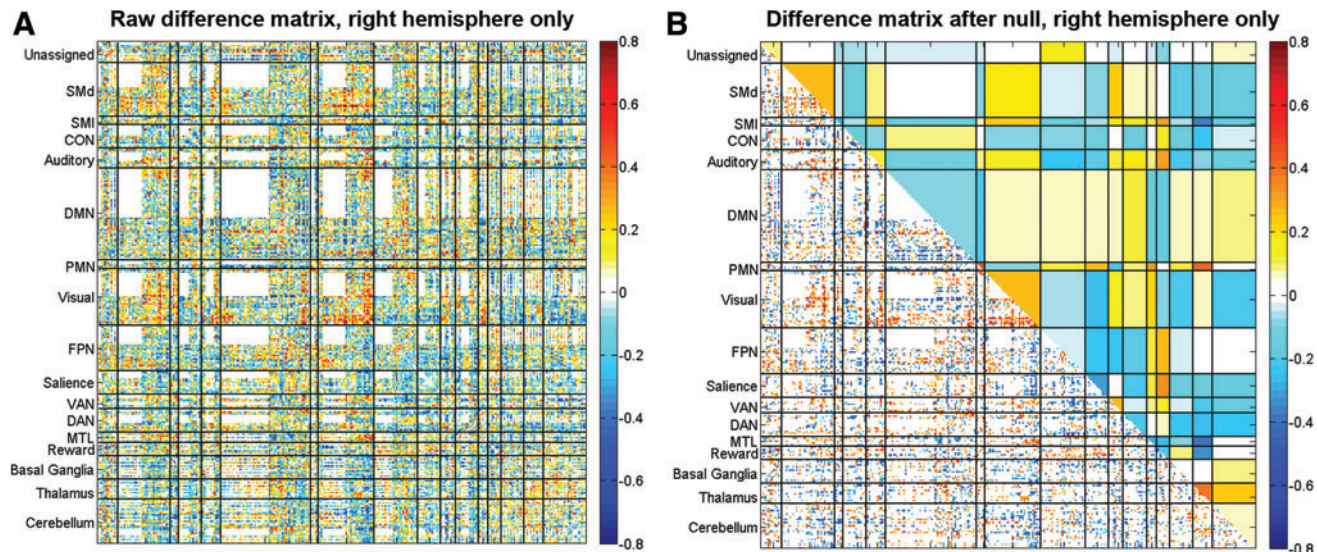

**SUPPLEMENTARY FIG. S2.** Changes in functional networks in the right hemisphere only. Because the right hemisphere did not contain a tumor and was not affected by the laser ablation, the analysis shown in Figure 3 was repeated for the right hemisphere only to further isolate the effects of the radiation. **(A)** The raw difference matrix showing the change in correlation between time points (pre-WBRT – post-WBRT). **(B)** The difference matrix after the conservative null model was used to eliminate the effects of sampling variability. The bottom triangle of the matrix **(B)** shows correlation differences that survived the null model. The blue (pre < post) and yellow (pre > post) blocks in the upper triangle of the matrix in **(B)** represent mean network-wise (block-level) changes in the right hemisphere.
