# Supplementary material
Source: PubMed Central journal article supplement (PMC7044779)
Supplement: Supp_Fig3.pdf [file Supp_Fig3.pdf]

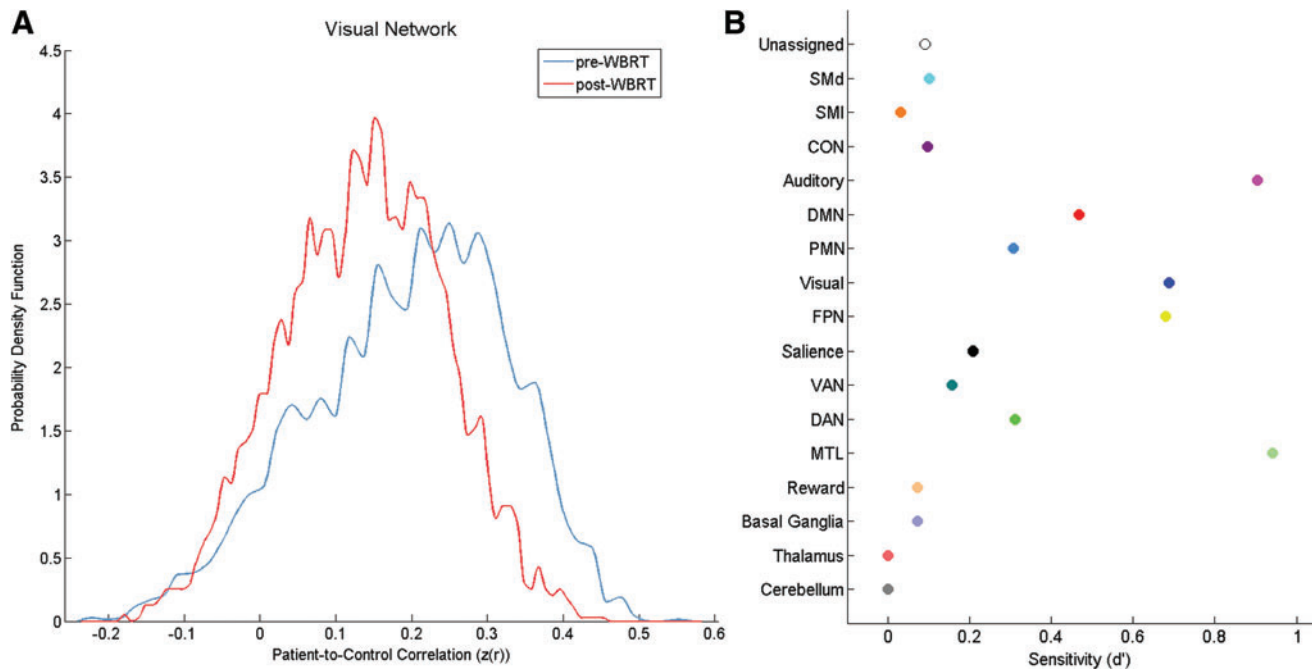

**SUPPLEMENTARY FIG. S3.** z-Scored correlation coefficient distribution across ROIs (A) and network sensitivity to radiation (B) in the right hemisphere only. Because the right hemisphere did not contain a tumor and was not affected by the laser ablation, the Aberrant Functional Connectivity Analysis shown in Figure 4 was repeated for the right hemisphere only to further isolate the effects of the radiation. ROIs, regions of interest.
